# Supplementary material for: Chiral metal–organic frameworks grown in situ for monolithic capillary electrochromatographic enantioseparation
Source: Royal Society of Chemistry journal article supplement (doi:10.1039/d4ay00990h), 2024-01-01
Supplement: d4ay00990h1.pdf [file d4ay00990h1.pdf]

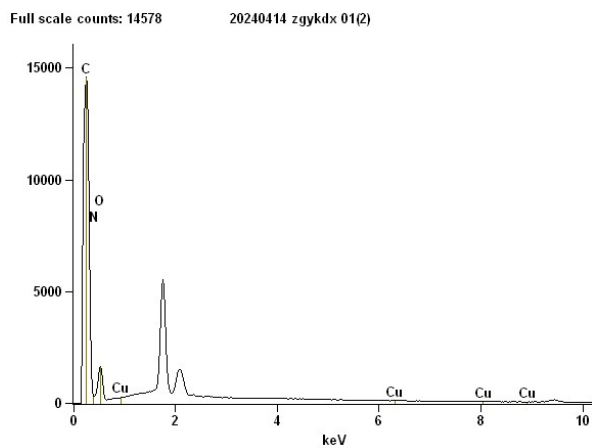

Fig. S1 Energy dispersive spectrometry (EDS) of Cu-TC@monolithic column

Table S1 List of element contents of Cu-TC@monolithic column

| Cu-TC@monolithic column | <i>C</i> | <i>N</i> | <i>O</i> | <i>Cu</i> |
|-------------------------|----------|----------|----------|-----------|
| Weight %                | 66.97    | 13.51    | 17.28    | 2.24      |
| Atom %                  | 72.71    | 12.38    | 13.86    | 1.05      |

**Table S2 Reports on chiral separation system of monolithic capillary electrochromatography based on metal-organic framework**

| CMOF        | chiral selectors | Analyte                                                                                                                                   | Rs        | Analysis time | Advantage                                                                                               | Disadvantage                                                                                       | Ref.      |
|-------------|------------------|-------------------------------------------------------------------------------------------------------------------------------------------|-----------|---------------|---------------------------------------------------------------------------------------------------------|----------------------------------------------------------------------------------------------------|-----------|
| MOF-5       | pepsin           | Nefopam,<br>chlorpheniramine;<br>clenbuterol;<br>Hydroxyzine;<br>Chloroquine<br>Hydroxychloroquine<br>Chloroquine;<br>Hydroxychloroquine; | 0.65~2.41 | <12 min       | /                                                                                                       | Low Rs;<br>Sample peak tailing;<br>Chiral selectors are required and bonding steps are cumbersome; | [1]       |
| ZIF-8       | pepsin           | Clenbuterol; nefopam;<br>amlodipine;<br>Hydroxyzine                                                                                       | 0.72~2.50 | <12 min       | /                                                                                                       | Low Rs;<br>Sample peak tailing;<br>Chiral selectors are required and bonding steps are cumbersome; | [2]       |
| MIL-100(Fe) | Lipase           | Leucine; Isoleucine;<br>Norleucine; Histidine;<br>Alanine; Valine;<br>Norvaline; Serine;<br>Carnitine;                                    | 2.02~4.81 | <14 min       | Baseline separation is achieved and peak shape is symmetrical;                                          | Chiral selectors are required and bonding steps are cumbersome;                                    | [3]       |
| Cu-TC       | /                | Propranolol; amlodipine;<br>naproxen; histidine;<br>tryptophan;<br>phenylalanine                                                          | 3.75~6.75 | <18 min       | Satisfactory resolution;<br>peak shape is symmetrical;<br>no additional bonded chiral selector required | /                                                                                                  | This work |

## Reference

1. P.D. Miao, L. Zhang, J. Zhang, M.X. Ma, Y.X. Du, J. Gan, J.X. Yang, *Journal of Chromatography B* 2022, 1203, 123306.
2. W. Ding, T. Yu, Y.X. Du, X.D. Sun, Z.J. Feng, S.Y. Zhao, X.F. Ma, M.X. Ma, C. Chen, *Microchimica Acta* (2020) 187: 51.
3. G.L. Sun, D.M. Choi, H.L. Xu, S.H. Baeck, K.H. Row, W.Y. Tang, *Microchimica Acta* (2023) 190:84.
